# Supplementary material for: Au dossier des metiers de l'informatique (On Computer Science Personnel).
Source: Springer Nature journal article supplement (doi:10.1186/s12931-016-0466-9), 1976-01-01

## Minute ventilation

(mL/g/min)

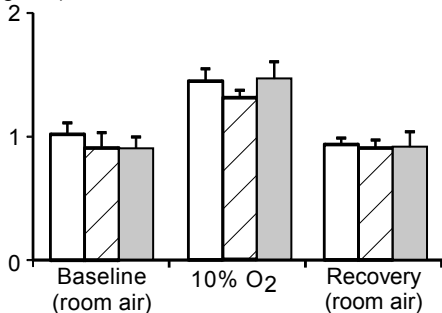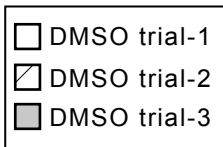

## Tidal volume

( $\mu$ L/g)

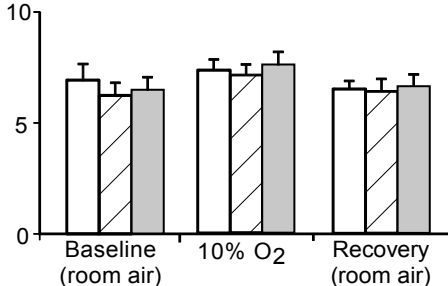

## Respiratory rate

(breath/min)

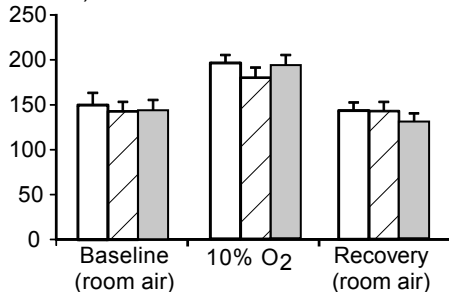

Supplement: MOESM1 [file 11044750]
